# Supplementary material for: Organized Sport Participation and Stress-Related Motivation for Physical Activity among Chilean Children and Adolescents: A National Cross-Sectional Study
Source: Research Square preprint supplement (doi:10.21203/rs.3.rs-8503202/v1), 2026-02-17
Supplement: Supplementary file 1 [file 7babf79f59bddfff7ae9ec79.docx]

**Supplementary Table S1.** Sensitivity analyses of the association between organized sport participation and stress-related motivation for physical activity under alternative outcome codings

**Outcome:** Stress-related motivation for physical activity
**Exposure:** Organized sport participation (Yes vs No)
**Data:** ENAFyD 2024 (unweighted)

| **Scenario** | **Outcome definition** | **N** | **OR (95% CI)** |
| --- | --- | --- | --- |
| S1 – Complete-case (main analysis) | Yes vs No, missing excluded | 2,651 | 0.51 (0.44–0.60) |
| S2 – Missing coded as “No” | Yes vs No+Missing | 4,150 | 0.58 (0.51–0.67) |
| S3 – Missing coded as “Yes” | Yes+Missing vs No | 4,150 | 0.65 (0.57–0.74) |
| S4 – Inverted outcome (complete-case) | No vs Yes | 2,651 | 1.95 (1.66–2.28) |
| S5 – Inverted outcome (missing as No) | No+Missing vs Yes | 4,150 | 1.71 (1.49–1.96) |

**Note:** All models were adjusted for sex, age group, socioeconomic status, and area of residence. Odds ratios >1 in inverted scenarios reflect the mathematical inverse of the main outcome coding.

Sensitivity analyses were conducted using alternative codings of the stress-related motivation outcome, including treating missing responses as “no” or “yes” and inverting the outcome definition. Across all plausible scenarios, the association between organized sport participation and stress-related motivation remained consistent in direction and magnitude, supporting the robustness of the main findings (Supplementary Table S1).
